# Supplementary material for: Smoke Emission Properties of Floor Covering Materials of Furnished Apartments in a Building
Source: MDPI journal article supplement (doi:10.3390/ijerph17239019), 2020-12-03

Supplementary material

Table 1. Photos of the tested samples.

| Number samples | Photo                                                                                |
|----------------|--------------------------------------------------------------------------------------|
| 1              |    |
| 2              |   |
| 3              |  |
| 4              |  |

5

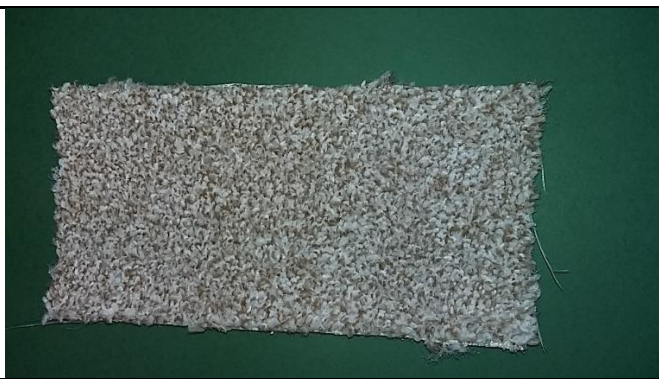

Supplement: s1 [file s1]
